# Supplementary material
Source: MDPI journal article supplement (https://www.mdpi.com/2226-4310/11/1/81)
Supplement: s1 [file s1]

Supplementary

# Enhancing RDX Thermal Decomposition in Al@RDX Composites with Co Transition Metal Interfacial Layer

Su-Lan Yang <sup>1</sup>, Kan Xie <sup>1,\*</sup>, Jing Wang <sup>1</sup>, Bingchen An <sup>1</sup>, Bin Tian <sup>1</sup>, Hongqi Nie <sup>2</sup>, Jie-Yao Lyu <sup>2</sup> and Qi-Long Yan <sup>2</sup>

<sup>1</sup> Aerospace College, University of Electronic Science and Technology of China, Chengdu 611731, China; yangsl@uestc.edu.cn (S.Y.); 202322100519@std.uestc.edu.cn (J.W.); 202321100509@std.uestc.edu.cn (B.A.)

<sup>2</sup> Science and Technology on Combustion, Internal Flow and Thermo-Structure Laboratory, Northwestern Polytechnical University, Xi'an 710072, China

\* Correspondence: xiekan@uestc.edu.cn

## A. Optimal of the Formulation

**Table S1.** Heat of reaction Al/Co/RDX composites with different oxidant contents measured by oxygen bomb calorimeter.

| Al/Co/xRDX                             | x    |       |       |       |       |      |
|----------------------------------------|------|-------|-------|-------|-------|------|
|                                        | 0    | 10    | 20    | 30    | 40    | 50   |
| Heat of reaction (J·cm <sup>-3</sup> ) | 6293 | 10032 | 12190 | 12551 | 12146 | 9765 |
|                                        |      |       |       | 29.77 |       |      |

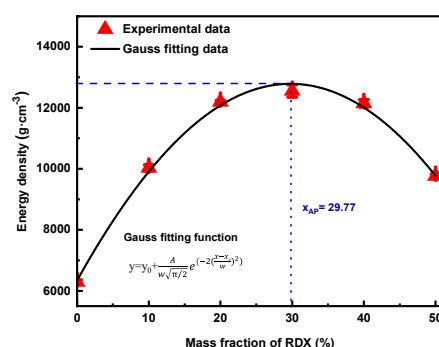

**Figure S1.** Fitting curves for heat of reaction of Al/Co/RDX composites.

## B. The Fitting Curve of RDX Decomposition Reaction Peaks

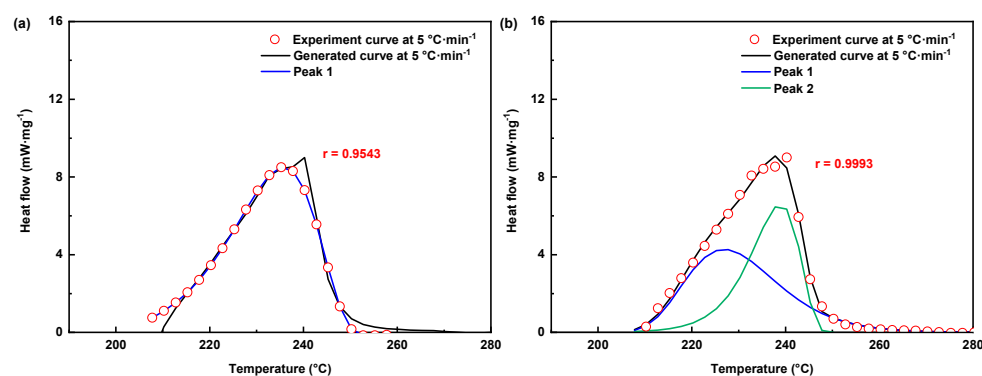

**Figure S2.** The fitting curve of RDX decomposition reaction peaks includes overlapping reactions of one step (a) and two steps (b).
